# Supplementary material for: Scoping Potential Routes to UK Civil Unrest via the Food System: Results of a Structured Expert Elicitation
Source: MDPI journal article supplement (doi:10.3390/su152014783), 2023-10-12
Supplement: s1 [file s1]

Archive with 1 entries (1 files):
- sustainability-2584562-supplementary.pdf
